# Supplementary figures and images for: Phage ϕC2 Mediates Transduction of Tn6215, Encoding Erythromycin Resistance, between Clostridium difficile Strains
Source: PubMed Central journal article supplement — mBio. 2013 Nov 19;4(6):e00840-13. doi: 10.1128/mBio.00840-13 (PMC3870246; doi:10.1128/mbio.00840-13), 2013-11-19

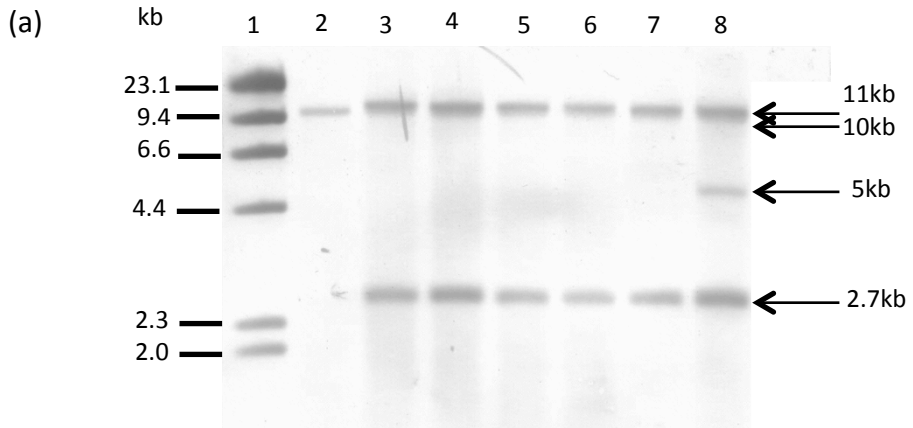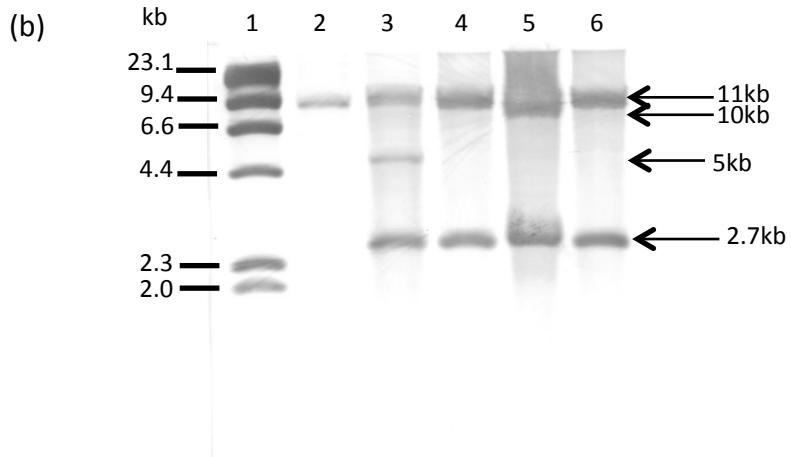

Supplement: mbo006131670sf01.pdf [file mbo006131670sf01.pdf]

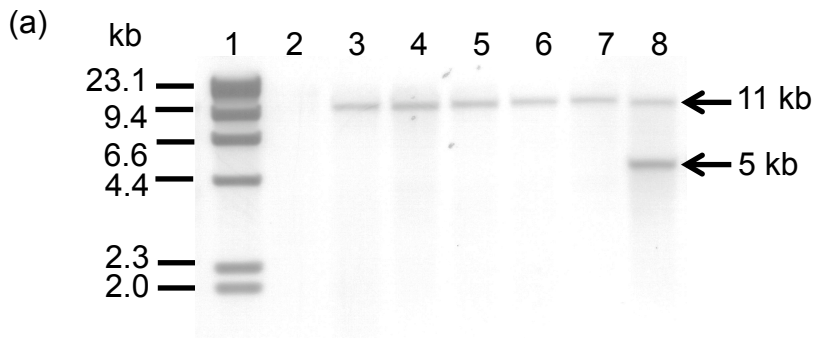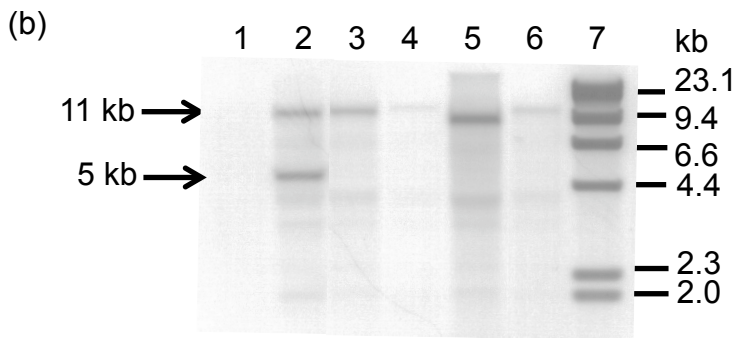

Supplement: mbo006131670sf02.pdf [file mbo006131670sf02.pdf]
